# Supplementary material for: Improved antifouling properties and blood compatibility of 3-methacryloxypropyl trimethoxysilane – based zwitterionic copolymer modified composite membranes via in situ post-crosslinking copolymerization
Source: Royal Society of Chemistry journal article supplement (doi:10.1039/c4ra14755c), 2015-01-01
Supplement: c4ra14755c1.pdf [file c4ra14755c1.pdf]

**Improved antifouling property and blood compatibility of 3-methacryloxypropyl trimethoxysilane - based zwitterionic copolymer modified composite membranes via in situ post-crosslinking copolymerization**

Tao Xiang<sup>a</sup>, Ting Lu<sup>a</sup>, Rui Wang<sup>a</sup>, Cheng Wang<sup>a</sup>, Shu-Dong Sun<sup>a</sup>, Hong-Bo He<sup>b,\*</sup>, Chang-

Sheng Zhao<sup>a,c,\*\*</sup>

<sup>a</sup> College of Polymer Science and Engineering, State Key Laboratory of Polymer Materials Engineering, Sichuan University, Chengdu 610065, China

<sup>b</sup> West China Hospital, Sichuan University, Chengdu 610041, China

<sup>c</sup> National Engineering Research Center for Biomaterials, Sichuan University, Chengdu 610064, China

**\*Corresponding author.**

E-mail address: hxhehongbo@hotmail.com (\*) or zhaochsh70@163.com (\*\*)

Tel.: +86-28-85400453; Fax: +86-28-85405402.

## Supporting Information

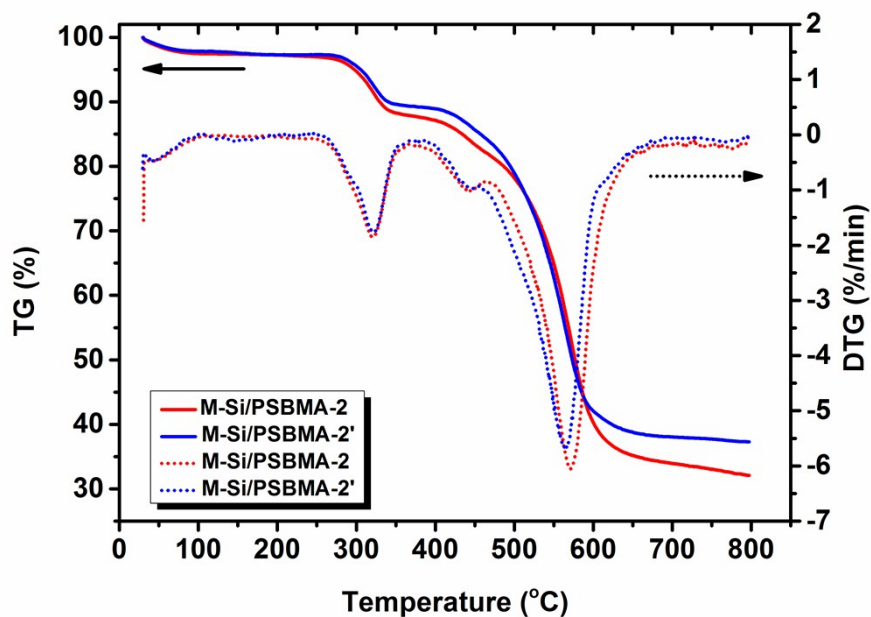

**Figure S1.** Thermogravimetry (TG) and derivative thermogravimetry (DTG) curves for the M-Si/PSBMA-2 membrane before and after compacting with water at the pressure 0.05 MPa for 24 h.

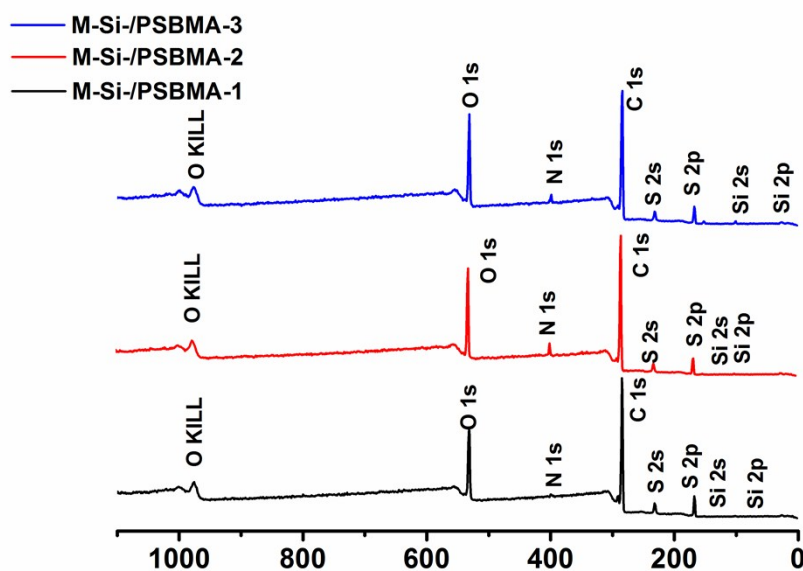

**Figure S2.** XPS spectra of wide scan for the M-Si/PSBMA-1~3 membranes.

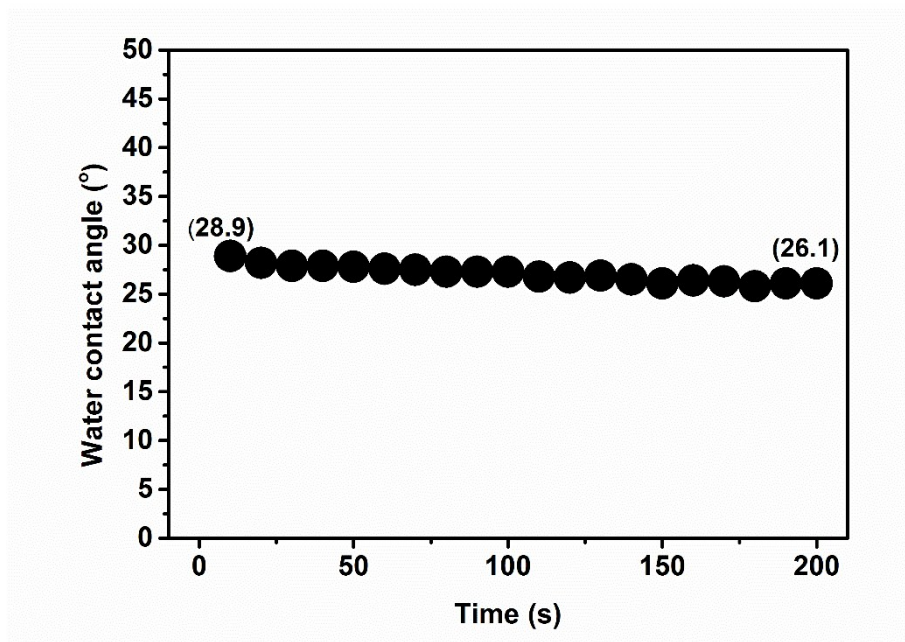

**Figure S3.** Water contact angles of glass slide from 0 to 200 s.
